# Supplementary material for: A biomineralized Prussian blue nanotherapeutic for enhanced cancer photothermal therapy
Source: Royal Society of Chemistry journal article supplement (doi:10.1039/d2tb00775d), 2022-01-01
Supplement: d2tb00775d1.pdf [file d2tb00775d1.pdf]

## Supplementary Information

### A Biomineralized Prussian Blue Nanotherapeutic for Enhanced Cancer

#### Photothermal Therapy

Daliang Zhong<sup>a,b</sup>, Yuxin Wang<sup>a,b</sup>, Fan Xie<sup>a,b</sup>, Siying Chen<sup>a,b</sup>, Xinyan Yang<sup>c</sup>, Zaiqiang Ma<sup>d</sup>, Shibo Wang<sup>a,b</sup>, M. Zubair Iqbal<sup>a,b</sup>, Jian Ge<sup>e</sup>, Quan Zhang<sup>a,b</sup>, Ruibo Zhao<sup>\*a,b,f</sup>, Xiangdong Kong<sup>a,b</sup>

<sup>a</sup> Institute of Smart Biomaterials, School of Materials Science and Engineering, Zhejiang Sci-Tech University, Hangzhou 310018, Zhejiang, China

<sup>b</sup> Zhejiang-Mauritius Joint Research Center for Biomaterials and Tissue Engineering, Zhejiang Sci-Tech University, Hangzhou 310018, Zhejiang, China

<sup>c</sup> School of Laboratory Medicine and Bioengineering, Hangzhou Medical College, Hangzhou 311399, Zhejiang, China

<sup>d</sup> Department of Chemistry, Zhejiang University, Hangzhou 310027, Zhejiang, China

<sup>e</sup> College of Life Sciences, China Jiliang University, Hangzhou 310018, Zhejiang, China

<sup>f</sup> Department of Materials, Imperial College London, London SW7 2AZ, UK

Corresponding Author E-mail: rzhao@zstu.edu.cn (R.Z).

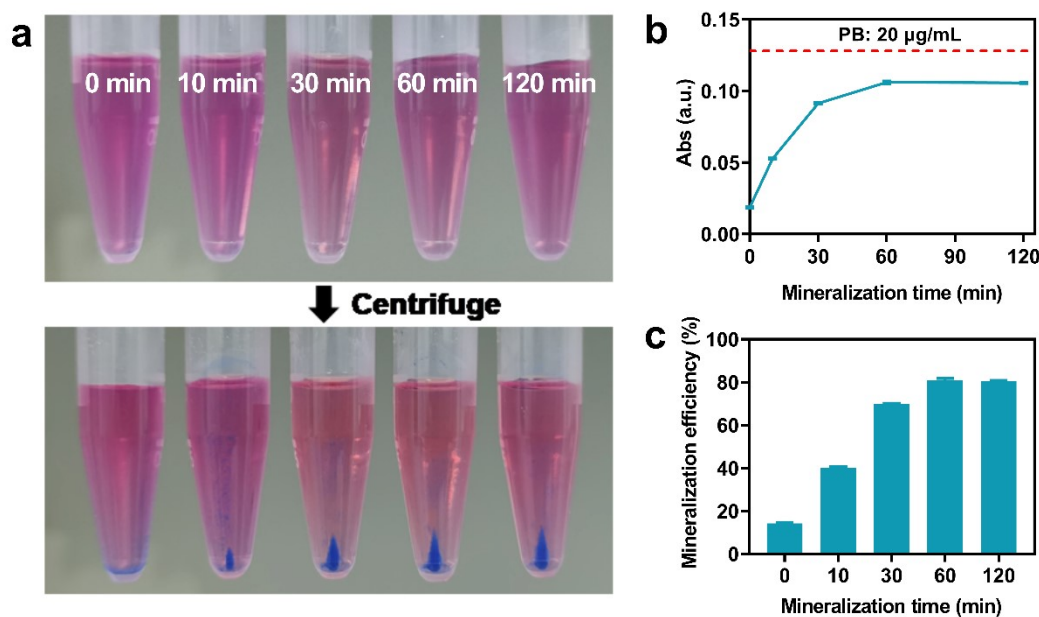

**Fig. S1** (a) Photograph of the representative PB mineralization time (Time:min; 20 µg/mL PB and 40 mM Ca<sup>2+</sup> in DMEM). (b) The absorbance of PB within mineral precipitation. (c) Mineralization efficiency of PB.

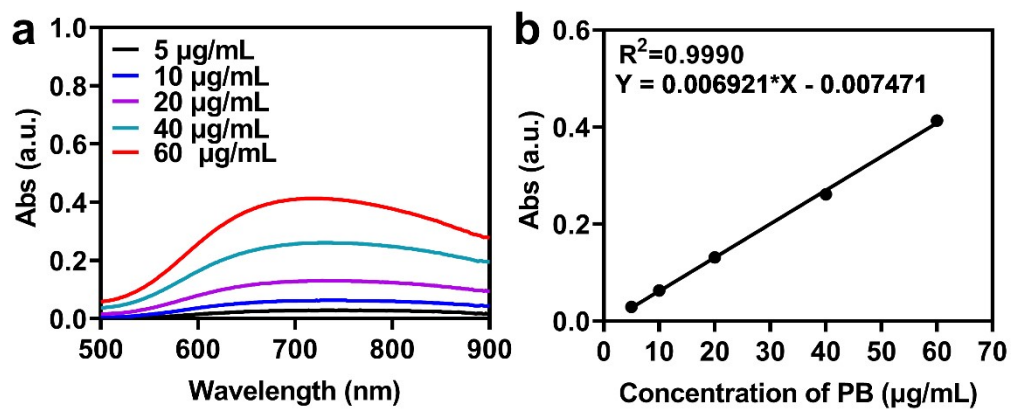

Fig. S2 Standard curve of Prussian blue in acid solution.

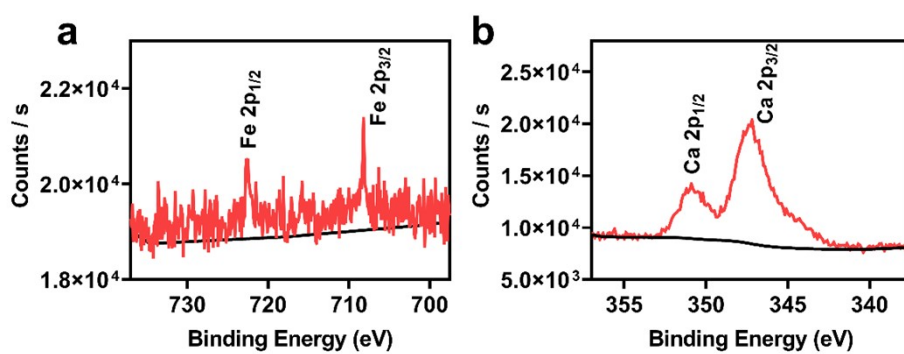

Fig. S3 XPS analysis of CaP&PB. (a) Fe. (b) Ca.

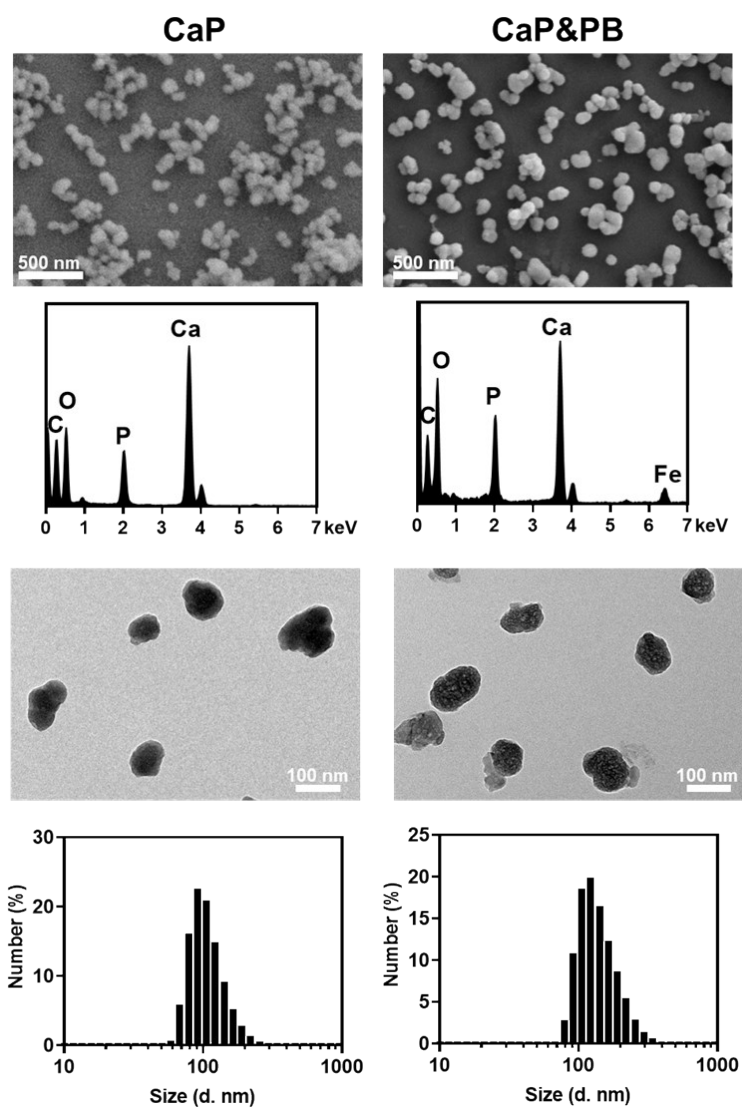

**Fig. S4** Characterization of CaP&PB and CaP nanoparticles (SEM, EDS, TEM, DLS).

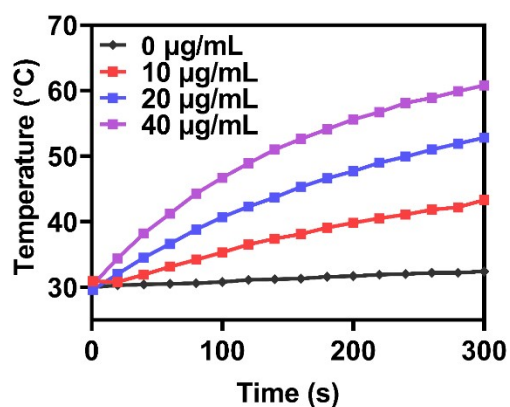

**Fig. S5** The temperature change with time in different concentrations (the parentheses indicate the PB content: µg/mL) of CaP&PB.

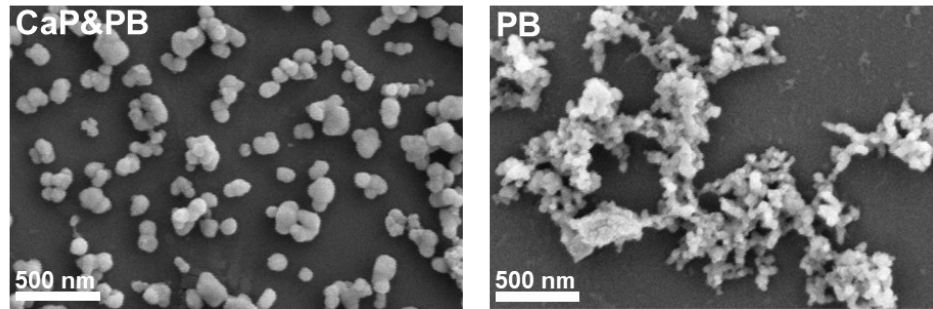

**Fig. S6** SEM image of CaP&PB and PB.

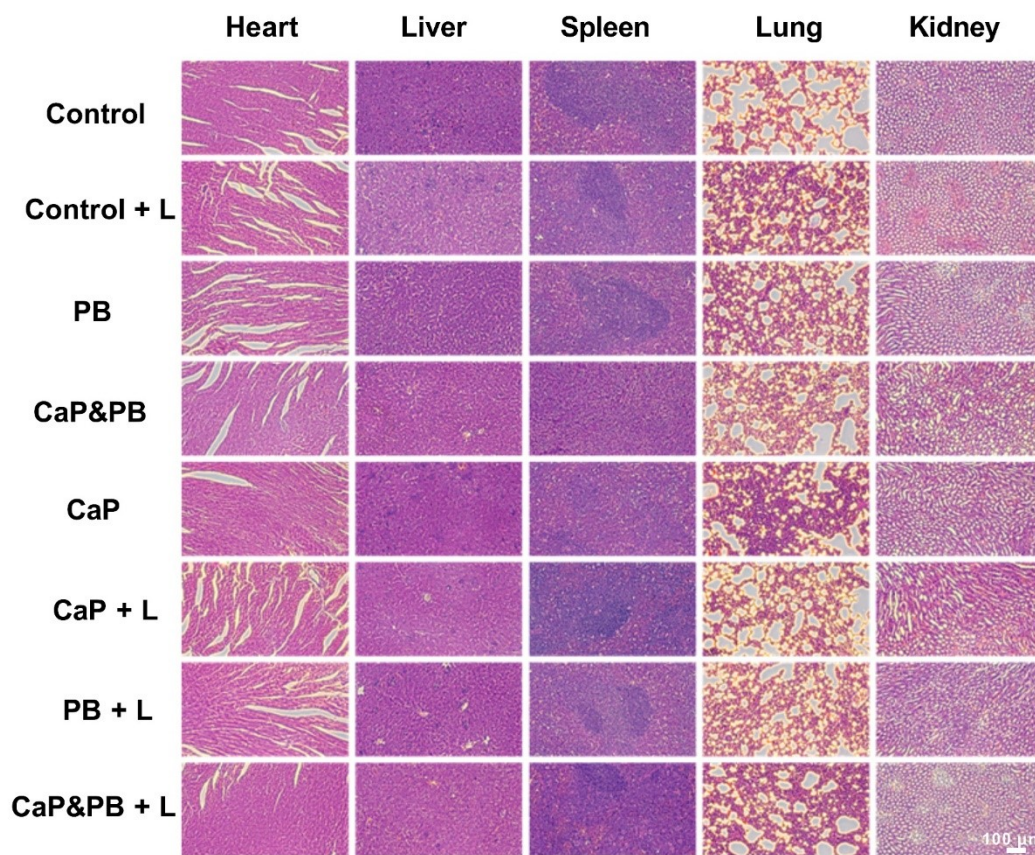

**Fig. S7** H&E staining images in major organs (liver, heart, kidney, lung, and spleen).

**Table. S1** PB loading rate

|                       | 1     | 2     | 3     | 4     | 5     |
|-----------------------|-------|-------|-------|-------|-------|
| CaP&PB/ $\mu\text{g}$ | 200   | 200   | 200   | 200   | 200   |
| Absorbance of PB      | 0.137 | 0.138 | 0.138 | 0.137 | 0.138 |
| PB/ $\mu\text{g}$     | 21.01 | 21.03 | 21.03 | 21.01 | 21.03 |
| loading rate<br>(wt)% | 10.50 | 10.51 | 10.51 | 10.50 | 10.51 |
